# Supplementary figures and images for: Roles for intracellular cation transporters in respiratory growth of yeast
Source: Royal Society of Chemistry journal article supplement (doi:10.1039/c9mt00145j), 2019-08-06

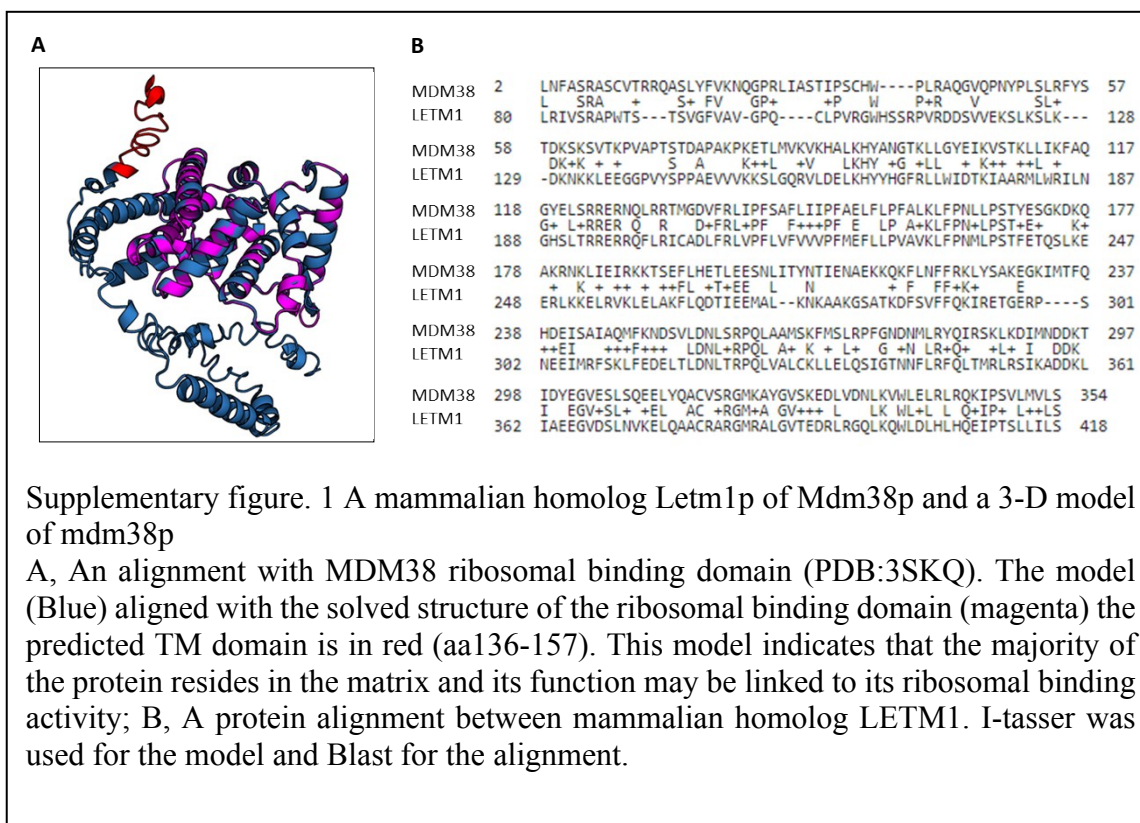

Supplement: c9mt00145j1.pdf [file c9mt00145j1.pdf]
